# Supplementary material for: Quantitative Disease Resistance to White Pine Blister Rust at Southwestern White Pine’s (Pinus strobiformis) Northern Range
Source: Frontiers journal article supplement (doi:10.3389/ffgc.2021.765871), 2021-11-11
Supplement: Table_3.xlsx [file Table_3.xlsx]

## Sheet: S1_Family_Trait_Means
Order	TreeID	Site	Rstatus	n	Mean Yr2Ht (cm)	Mean Yr3Ht (cm)	#Spot1	%Spot1	#Canker1	%SS1	%Rmort1	%RSurv1	mean Sev1	#nc2	%Spot2	#SS2	%SS2	#BRall2	%BRall2	%SSF2	%SSALV2	%Rmort2	%RSurv2	mean Sev2	%SS3	%BRall3	%SSF3	%SSALV3	%Rmort3	%RSurv3	mean sev3	%SS4	%BRall4	%SSF4	%SSALV4	%Rmort4	%RSurv4	mean sev4	%SS5	%BRall5	%SSF5	%SSALV5	%Rmort5	%RSurv5	mean sev5	%SS6	%BRall6	%SSF6	%SSALV6
6	2	Lincoln_R	1	38	21.21	45.95	44.18	100	1.58	31.58	0	100	0.34	3.32	84.62	4.55	63.16	1.96	54.17	36.84	63.1579	0	100	2.05	65.79	60	34.21	56	28.95	71.05	3.55	71.05	62.96	28.95	56	34.21	65.79	3.66	71.05	62.96	28.95	56	34.21	65.79	3.71	73.68	64.29	26.32	60
3	11	Lincoln_R	1	56	16.32	31.21	34.84	98.21	4.27	69.64	0	100	0.96	3.7	58.33	6.86	89.29	3.54	48	10.71	89.0909	1.79	98.21	3.18	92.86	50	7.14	59.6154	37.5	62.5	5.11	94.64	54.72	5.36	88.8889	51.79	48.21	5.63	94.64	56.6	5.36	88.4615	53.57	46.43	5.77	96.43	55.56	3.57	90.4762
4	15	Lincoln_R	1	59	24.74	47.99	35.64	100	2.42	55.93	0	100	0.71	5.76	95.45	7	86.44	1.43	50.98	13.56	86.4407	0	100	2.93	88.14	53.85	11.86	61.5385	33.9	66.1	4.2	88.14	59.62	11.86	81.5789	35.59	64.41	4.15	89.83	60.38	10.17	84.2105	35.59	64.41	4.12	89.83	60.38	10.17	84.2105
5	16	Lincoln_R	1	23	16.38	29.43	47.09	100	2.04	47.83	0	100	0.52	4.22	83.33	5.7	73.91	2	29.41	26.09	72.7273	4.35	95.65	3.17	82.61	31.58	17.39	36.8421	52.17	47.83	5.43	82.61	31.58	17.39	63.6364	52.17	47.83	5.43	82.61	31.58	17.39	63.6364	52.17	47.83	5.43	82.61	31.58	17.39	63.6364
7	27	Lincoln_R	1	39	19.7	42.85	27.49	100	1.36	25.64	0	100	0.31	0.46	60	1.41	51.28	1.85	45	48.72	50	2.56	97.44	0.87	51.28	60	48.72	90	5.13	94.87	1.41	56.41	72.73	43.59	51.4286	10.26	89.74	1.85	64.1	76	35.9	57.5758	15.38	84.62	2.05	64.1	76	35.9	57.5758
8	50	Lincoln_R	1	43	21.69	40.45	61.28	100	2.74	55.81	0	100	0.88	6.21	68.97	8.4	76.74	2.85	39.39	23.26	75.6098	4.65	95.35	3.6	83.72	44.44	16.28	36.1111	53.49	46.51	6.02	88.37	52.63	11.63	68.75	62.79	37.21	6.42	88.37	52.63	11.63	66.6667	65.12	34.88	6.6	88.37	52.63	11.63	64.2857
9	51	Lincoln_R	1	54	21.11	38.56	27.46	100	3.37	59.26	0	100	0.69	3.56	67.86	5.41	77.78	2.38	50	22.22	76.4706	5.56	94.44	2.54	83.33	48.89	16.67	57.7778	35.19	64.81	4.93	88.89	56.25	11.11	76.9231	51.85	48.15	5.65	88.89	56.25	11.11	75	55.56	44.44	5.91	90.74	57.14	9.26	78.2609
10	64	Lincoln_R	1	57	23.29	40.26	27.58	100	2.32	47.37	0	100	0.65	6.61	79.41	7.23	75.44	0.81	32.56	24.56	75	1.75	98.25	2.91	85.96	34.69	14.04	44.898	47.37	52.63	5.46	85.96	38.78	14.04	66.6667	57.89	42.11	5.77	85.96	38.78	14.04	65.2174	59.65	40.35	5.77	85.96	38.78	14.04	65.2174
11	72	Lincoln_R	1	58	18.4	32.07	20.43	98.28	2.33	53.45	0	100	1.02	10.9	80.36	11.45	98.28	0.56	21.05	1.72	98.2143	3.45	96.55	5.05	100	20.69	0	13.7931	86.21	13.79	8.81	100	20.69	0	0	100	0	9	100	20.69	0	0	100	0	9	100	20.69	0	0
12	74	Lincoln_R	1	59	22.84	42.86	27.92	96.61	2.37	50.85	0	100	0.66	8.95	89.47	10.05	100	1.1	30.51	0	100	1.69	98.31	5.03	100	30.51	0	16.9492	83.05	16.95	8.63	100	30.51	0	100	96.61	3.39	8.83	100	30.51	0	100	98.31	1.69	8.85	100	30.51	0	100
13	79	Lincoln_R	1	35	15.37	34.4	39.26	100	0.57	22.86	0	100	0.4	2.63	66.67	3.11	45.71	1.06	43.75	54.29	45.7143	0	100	1.54	45.71	43.75	54.29	56.25	20	80	2.23	48.57	47.06	51.43	33.3333	22.86	77.14	2.46	51.43	50	48.57	37.037	22.86	77.14	2.54	51.43	55.56	48.57	37.037
14	81	Lincoln_R	1	20	19.47	43.7	42.95	100	2.55	65	0	100	0.7	3.85	100	5.85	90	2.22	66.67	10	89.4737	5	95	2.9	90	66.67	10	72.2222	25	75	3.75	90	72.22	10	86.6667	25	75	3.8	90	72.22	10	86.6667	25	75	3.55	95	73.68	5	93.3333
15	82	Lincoln_R	1	60	21.09	42.6	28.4	100	1.95	38.33	0	100	0.45	3.28	65.79	4.47	75	1.58	48.89	25	75	0	100	2.4	80	54.17	20	41.6667	46.67	53.33	5.37	81.67	63.27	18.33	57.6923	56.67	43.33	5.8	81.67	63.27	18.33	56	58.33	41.67	5.87	81.67	63.27	18.33	54.1667
16	83	Lincoln_R	1	58	21.5	37.76	19.95	98.28	2.21	46.55	0	100	0.6	5.05	80.65	5.48	74.14	0.58	34.88	25.86	74.1379	0	100	2.67	79.31	36.96	20.69	58.6957	32.76	67.24	4.67	84.48	44.9	15.52	67.8571	51.72	48.28	5.26	86.21	48	13.79	70.3704	53.45	46.55	5.41	86.21	48	13.79	70.3704
17	84	Lincoln_R	1	47	19.67	39	33.74	100	3.15	68.09	0	100	0.91	3.77	64.71	5.02	89.36	1.4	45.24	10.64	89.3617	0	100	2.36	89.36	57.14	10.64	69.0476	27.66	72.34	3.79	91.49	62.79	8.51	87.0968	34.04	65.96	4.3	91.49	62.79	8.51	87.0968	34.04	65.96	4.23	93.62	63.64	6.38	90.3226
1	103	Lincoln_R	1	60	21.47	40.55	63.73	100	2.02	50	0	100	1	3.97	74.07	4.88	71.67	1.28	39.53	28.33	69.6429	6.67	93.33	2.78	75	44.44	25	48.8889	38.33	61.67	4.18	85	52.94	15	73.5294	43.33	56.67	4.62	86.67	53.85	13.33	75.7576	45	55	4.75	86.67	53.85	13.33	75
2	104	Lincoln_R	1	42	15.7	30.7	18.64	100	2.57	64.29	0	100	0.95	10.4	93.55	11.62	95.24	1.28	22.5	4.76	94.8718	7.14	92.86	5.62	95.24	22.5	4.76	35	61.9	38.1	7.48	95.24	22.5	4.76	75	80.95	19.05	7.64	95.24	22.5	4.76	75	80.95	19.05	7.6	95.24	22.5	4.76	75
18	CIF-401	Cibola	0	21	17.7	27.75	14.19	100	2.24	42.86	0	100	0.62	6.38	50	8.48	100	2.1	42.86	0	100	4.76	95.24	6.1	100	42.86	0	0	100	0	9	100	42.86	0	0	100	0	9	100	42.86	0	0	100	0	9	100	42.86	0	0
19	CIF-402	Cibola	0	59	19.42	33.22	25.1	100	4.88	79.66	0	100	1.08	10.51	91.43	10.95	98.31	0.45	3.45	1.69	97.2973	37.29	62.71	7.68	98.31	3.45	1.69	1.72414	96.61	3.39	8.75	98.31	3.45	1.69	50	96.61	3.39	8.71	98.31	3.45	1.69	50	96.61	3.39	8.71	98.31	3.45	1.69	50
20	CIF-403	Cibola	0	50	16.58	26.65	80.6	100	4.12	62	0	100	1.08	13.8	83.78	14.68	98	0.9	16.33	2	97.619	16	84	6.68	98	16.33	2	10.2041	88	12	8.4	98	16.33	2	80	90	10	8.42	100	18	0	100	90	10	8.42	100	18	0	100
21	CIF-404	Cibola	0	43	17.61	30.36	84.05	100	2.81	48.84	0	100	0.63	9.49	79.17	10.84	83.72	1.61	41.67	16.28	83.7209	0	100	3.72	83.72	41.67	16.28	50	41.86	58.14	5.6	83.72	47.22	16.28	66.6667	51.16	48.84	5.74	83.72	47.22	16.28	66.6667	51.16	48.84	5.65	83.72	47.22	16.28	65
22	CIF-405	Cibola	0	51	17.62	28.12	60.4	100	3.2	58.82	1.96	98.04	1.02	13.26	100	13.33	92.16	0.36	10.64	7.84	91.4894	7.84	92.16	6.12	92.16	12.77	7.84	14.8936	78.43	21.57	7.65	92.16	14.89	7.84	60	80.39	19.61	7.65	94.12	16.67	5.88	70	80.39	19.61	7.63	94.12	16.67	5.88	70
23	CIF-406	Cibola	0	51	16.18	24.8	68.27	100	1.27	52.94	0	100	0.69	9.67	87.5	9.71	96.08	0.04	4.08	3.92	95.2381	17.65	82.35	6.22	98.04	6	1.96	8	90.2	9.8	8.47	98.04	6	1.96	66.6667	94.12	5.88	8.51	98.04	6	1.96	66.6667	94.12	5.88	8.51	98.04	6	1.96	66.6667
24	CIF-407	Cibola	0	60	20.26	35.28	48.2	100	2.5	66.67	0	100	1.15	9.47	82.22	10.03	95	0.6	14.04	5	94.1176	15	85	6.33	95	14.04	5	12.2807	83.33	16.67	8.08	95	14.04	5	50	90	10	8.15	95	14.04	5	50	90	10	8.15	95	14.04	5	50
25	CIF-409	Cibola	0	60	20.07	32.22	55.33	100	3.72	68.33	0	100	0.88	11.98	82.69	12	95	0.02	1.75	5	94.7368	5	95	5.82	96.67	8.62	3.33	10.3448	86.67	13.33	8.05	96.67	8.62	3.33	71.4286	88.33	11.67	8.05	96.67	8.62	3.33	71.4286	88.33	11.67	8.13	96.67	8.62	3.33	71.4286
26	CIF-410	Cibola	0	60	23.38	37.16	17.18	98.33	2.83	60	0	100	0.8	11	75.51	12.07	95	1.12	28.07	5	94.6429	6.67	93.33	5.62	98.33	30.51	1.67	18.6441	80	20	7.98	100	33.33	0	100	86.67	13.33	8.13	100	33.33	0	100	86.67	13.33	8.12	100	33.33	0	100
27	CIF-411	Cibola	0	59	22.77	34.52	57.25	100	3.44	59.32	0	100	0.85	13.76	100	14.19	94.92	0.45	7.14	5.08	94.1176	13.56	86.44	6.49	94.92	8.93	5.08	5.35714	89.83	10.17	8.34	94.92	8.93	5.08	0	94.92	5.08	8.54	94.92	8.93	5.08	0	94.92	5.08	8.54	94.92	8.93	5.08	0
28	SF-1	Santa Fe	0	42	18.31	30.46	35.26	100	1.83	54.76	0	100	0.69	9.62	87.18	10.07	97.62	0.46	14.63	2.38	97.5	4.76	95.24	5.81	97.62	14.63	2.38	0	97.62	2.38	8.79	97.62	14.63	2.38	0	97.62	2.38	8.79	97.62	14.63	2.38	0	97.62	2.38	8.79	97.62	14.63	2.38	0
29	SF-10	Santa Fe	0	55	21.54	35.04	42.42	100	9.96	89.09	0	100	1.65	6.47	69.57	9.36	100	2.89	50.91	0	100	20	80	5.13	100	50.91	0	40	60	40	6.76	100	52.73	0	100	60	40	6.78	100	52.73	0	100	60	40	6.47	100	52.73	0	100
30	SF-2	Santa Fe	0	25	16.69	29.08	66.52	100	4.2	80	0	100	1.24	17.52	100	17.52	100	0	0	0	100	16	84	7.52	100	0	0	4	96	4	8.96	100	0	0	0	100	0	9	100	0	0	0	100	0	9	100	0	0	0
31	SF-3	Santa Fe	0	50	16.66	26.52	29.66	100	1.76	52	0	100	0.64	8.42	69.23	8.8	98	0.39	16.33	2	97.561	18	82	6.24	100	16	0	12	88	12	8.62	100	18	0	100	96	4	8.7	100	18	0	100	96	4	8.7	100	18	0	100
32	SF-4	Santa Fe	0	12	13.08	25.17	43.58	100	1.75	50	0	100	0.5	10.33	100	10.33	100	0	0	0	100	16.67	83.33	7.42	100	0	0	16.6667	83.33	16.67	8.83	100	0	0	0	100	0	9	100	0	0	0	100	0	9	100	0	0	0
33	SF-5	Santa Fe	0	37	13.31	23.15	45.59	100	1.78	48.65	0	100	0.65	9.27	82.86	9.68	100	0.41	13.51	0	100	2.7	97.3	6.51	100	16.22	0	5.40541	94.59	5.41	8.78	100	16.22	0	100	94.59	5.41	8.73	100	16.22	0	100	94.59	5.41	8.78	100	16.22	0	100
34	SF-6	Santa Fe	0	43	20.74	34.88	59.91	100	4.33	76.74	0	100	0.84	11	72.22	11.79	100	0.79	18.6	0	100	6.98	93.02	5.19	100	20.93	0	13.9535	86.05	13.95	8.47	100	20.93	0	100	86.05	13.95	8.4	100	20.93	0	100	90.7	9.3	8.47	100	20.93	0	100
35	SF-7	Santa Fe	0	59	20.56	33.59	31.32	100	4.08	61.02	0	100	1.31	11.98	75.51	13.25	100	1.27	16.95	0	100	15.25	84.75	7.22	100	16.95	0	1.69491	98.31	1.69	8.98	100	16.95	0	100	98.31	1.69	8.98	100	16.95	0	100	98.31	1.69	8.97	100	16.95	0	100
36	SF-8	Santa Fe	0	40	17.62	28.33	54.93	100	3.25	72.5	0	100	0.95	9	62.5	9.75	100	0.75	25	0	100	17.5	82.5	6.48	100	25	0	2.5	97.5	2.5	8.98	100	25	0	100	97.5	2.5	8.95	100	25	0	100	97.5	2.5	8.98	100	25	0	100
37	SF-9	Santa Fe	0	60	22.21	36.53	31.2	100	2.92	63.33	0	100	0.85	10.67	83.02	11.38	98.33	0.73	20.34	1.67	98.1818	8.33	91.67	6.18	100	23.33	0	11.6667	88.33	11.67	8.7	100	23.33	0	100	91.67	8.33	8.8	100	23.33	0	100	93.33	6.67	8.85	100	23.33	0	100
38	Susc_1	Lincoln_S	0	47	19.18	39.73	44.67	100	2.64	59.57	2.13	97.87	0.91	9.36	84.21	10.34	93.62	1.48	31.82	6.38	93.0233	8.51	91.49	5.62	93.62	31.82	6.38	20.4545	74.47	25.53	7.74	93.62	31.82	6.38	50	87.23	12.77	7.87	93.62	31.82	6.38	50	87.23	12.77	7.85	95.74	33.33	4.26	66.6667
39	Susc_2	Lincoln_S	0	48	20.01	33.43	15.54	95.83	4.92	60.42	0	100	0.69	9.08	83.33	9.81	87.5	0.83	21.43	12.5	85.7143	12.5	87.5	5.13	91.67	20.45	8.33	9.09091	83.33	16.67	7.96	93.75	22.22	6.25	50	87.5	12.5	8.04	93.75	22.22	6.25	50	87.5	12.5	7.94	93.75	22.22	6.25	50
40	Susc_3	Lincoln_S	0	33	15.82	28.36	28.21	100	3.64	57.58	0	100	1.3	13.94	86.21	13.94	90.91	0	0	9.09	90.625	3.03	96.97	6.06	93.94	0	6.06	6.45161	87.88	12.12	8.18	93.94	0	6.06	33.3333	90.91	9.09	8.21	93.94	0	6.06	33.3333	90.91	9.09	8.3	93.94	0	6.06	33.3333
				1873	19.1817	34.3672	40.999	99.6385	2.94725	56.9395	0.10225	99.8978	0.81925	8.3155	80.0345	9.26975	88.6902	1.13825	27.552	11.3097	88.2625	7.96525	92.0347	4.82225	90.5078	29.5425	9.49225	28.2657	67.1405	32.8595	6.87725	91.7067	32.0913	8.29325	62.8286	73.1828	26.8172	7.0355	92.1967	32.499	7.80325	63.8198	73.877	26.123	7.053	92.5847	32.763	7.41525	64.5497
[truncated: 16 more columns]
